# Supplementary material
Source: PubMed Central journal article supplement (PMC2932614)
Supplement: 1009331107_pnas.1009331107_SI.pdf [file 1009331107_pnas.1009331107_SI.pdf]

# Supporting Information

Cho et al. 10.1073/pnas.1009331107

## SI Text

**SI Materials and Methods. 1. Cloning and sequencing of aptamers from the R3 pool.** After 3 rounds of selection, the selected pool was PCR amplified with unlabeled forward and reverse primers at the optimized PCR cycle number determined by the pilot PCR. PCR products were purified with the MinElute PCR Purification Kit (Qiagen) and cloned into *Escherichia coli* using the TOPO TA cloning kit (Invitrogen). 98 colonies were randomly picked and sequenced at the GENEWIZ San Diego Laboratory.

**2. Nitrocellulose filter binding assay.** T4 polynucleotide kinase (NEB, Ipswich, MA) was used to 5' end label 10  $\mu$ M concentrations of ssDNA aptamers with  $\gamma$  [ $^{32}$ P]-ATP. Following a 40 min, 37  $^{\circ}$ C incubation step, the reaction was heat killed by taking the end labeled samples to a temperature of 70  $^{\circ}$ C for 10 min. The end labeled oligonucleotides were purified using Sephadex G-50 microspin columns (GE Healthcare).

Following purification, a 100 pM solution of  $\gamma$  [ $^{32}$ P] 5' end labeled aptamers was incubated with 1 nM of target protein (PDGF-BB) for 1.5 h at room temperature. 50  $\mu$ L of each sample

was subsequently applied to a mixed ester filter (Millipore) that had been pretreated with 1 mL of 0.1 mM  $\text{Na}_2\text{HPO}_4$ , 1.8 mM  $\text{KH}_2\text{PO}_4$ , 137 mM NaCl, 2.7 mM KCl, and 1 mM  $\text{MgCl}_2$  (PBSM) (pH = 7.4) buffer. The filters were immediately washed with 1 mL of PBSM buffer, and then removed from the filter holders and placed in scintillation liquid. Scintillation counts were generated, and the fraction of aptamers bound to the protein,  $q$ , was calculated from the following equation

$$q = [(A + P + F) - (A + F)] / (A + P)$$

where  $A$  stands for aptamer (either the library or the #1 sequence from Quantitative Selection of Aptamers through Sequencing (QSAS) R3/R2 set),  $P$  stands for PDGF-BB protein, and  $F$  stands for filtering. In other words, the fraction of aptamers in bound form  $q$ , is equal to the signal (in cpm) generated by filters treated with a mixture of protein and aptamer minus the signal generated by aptamer nonspecifically bound to the filter in the absence of protein, divided by the total signal generated from an unfiltered mixture of aptamer plus protein.

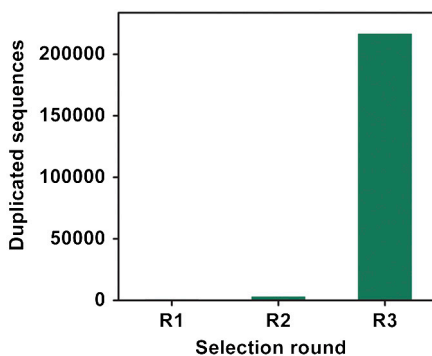

Fig. S1. Representation of the ten most frequently observed sequences from each selection pool. These had an average copy number of 594, 2,789, and 216,488 for R1, R2, and R3 pools, respectively.

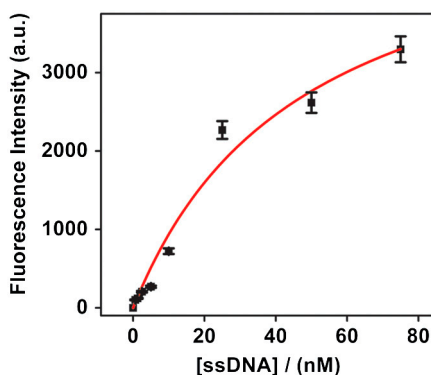

Fig. S2. The most frequently appeared sequence in the three pools was tested for its affinity for the PDGF-BB target via a fluorescence binding assay. Based on these measurements, we calculated a  $K_d$  of  $47.58 \pm 16.1$  nM, which is considerably higher (i.e., lower affinity) than other aptamers sorted by QSAS.

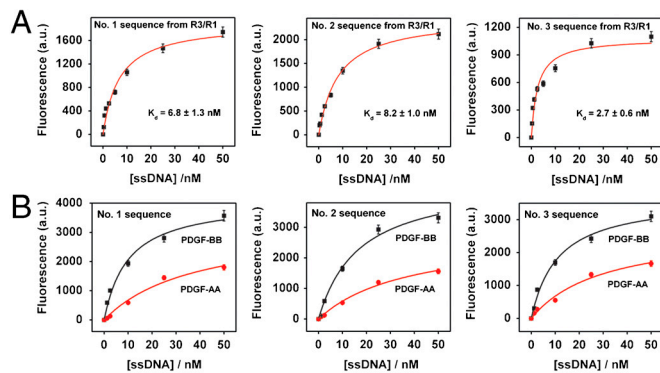

**Fig. S3.** The three most highly enriched sequences from QSAS R3/R1 were tested for their affinity (A) and specificity (B) for the PDGF-BB target via a fluorescence binding assay.

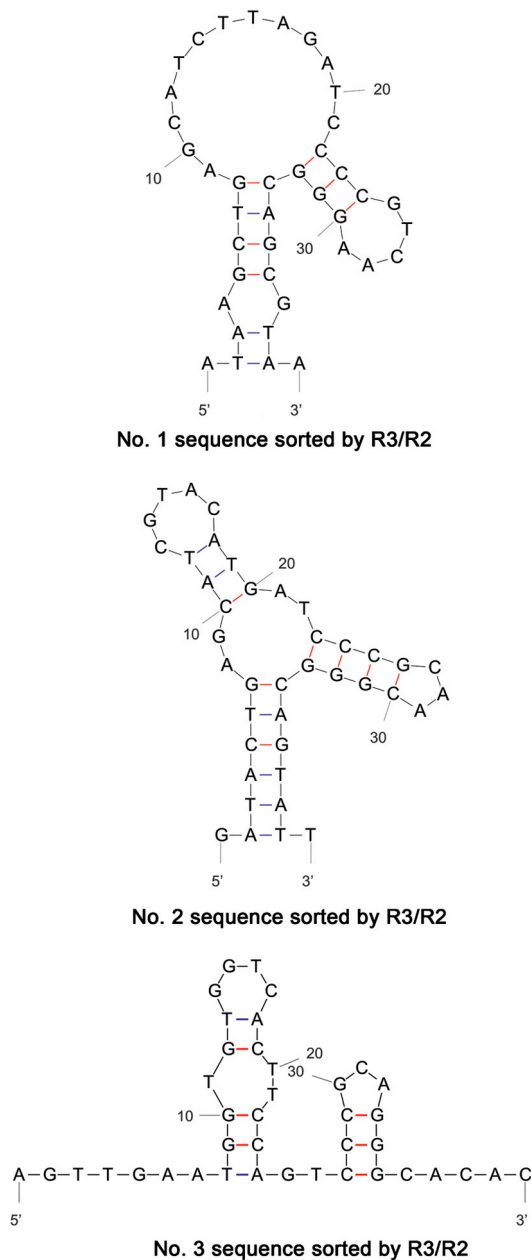

**Fig. S4.** Secondary structures of the three most highly enriched aptamer sequences obtained from QSAS R3/R2.



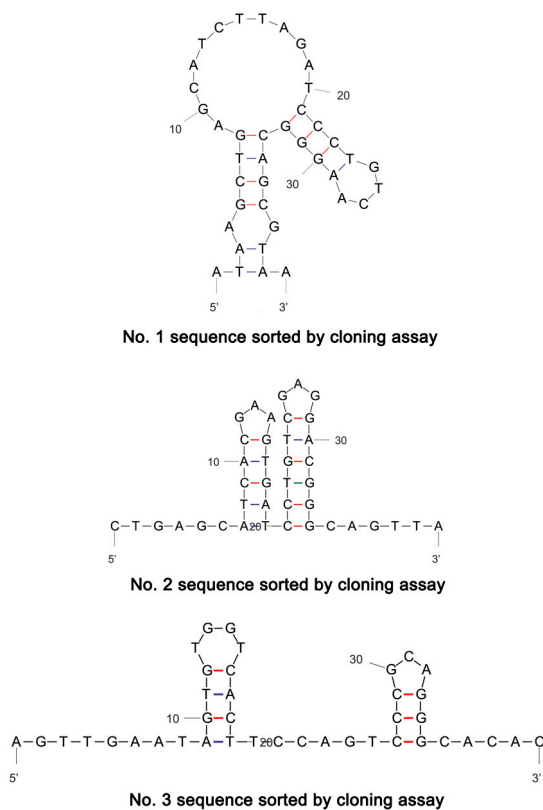

Fig. S6. Secondary structures of the top three enriched aptamer sequences obtained from randomly picked clones from the R3 pool.

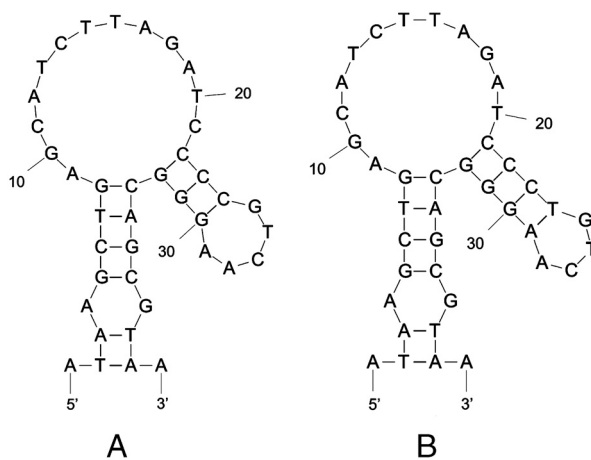

Fig. S7. The secondary structure of highly enriched PDGF-BB aptamers. (A) Sequence #1 identified by the QSAS R3/R2 method. (B) Sequence #3 identified by standard cloning and sequencing of the R3 pool. Although these two aptamers varied by only a single base, they exhibited markedly different binding affinities and specificities: the QSAS-derived sequence exhibited 6.4-fold higher binding affinity and 2.2-fold higher specificity for PDGF-BB in comparison with the cloning-derived sequence.



**Table S3. Aligned aptamer sequences obtained by traditional cloning from the selected R3 pool**

| Seq. ID | Sequences (5' → 3')                          |                    |
|---------|----------------------------------------------|--------------------|
| 21      | A—A—GTGGGGCACCAGGT—TTGGTCCCCGGATAGGGGCCACTT  | Group I (16.50%)   |
| 48      | GGGTCAGCGCGGAGTATCGTGTGGATCCCGTAGGGCGCCG     |                    |
| 32      | T—CGGTGAGGTATCCATTTGGATCCTCAGTCCTCAGGCACC    |                    |
| 3       | GC—G—CCGGTACCCTTAAGG—GTCCCGTCAGGGGGCGTCA     |                    |
| 58      | GGCGTCACTTCTAGT—CCCGTCCACGGGGGCCAGGGTTCT     |                    |
| 17      | T—CGCGGTCACTGCAATTAGATAGGAGTCCCGGAGGGCGCG    |                    |
| 26      | GCTTGCTACTATA—ACATAGTCTGGAAGGGAAGCGTAC       |                    |
| 12      | TCCTGCAGTTGGTCACTATCATTAGTCCCACAGGGCAACT     |                    |
| 35      | CGCTAAAGCTGTAC—TCTCAGTCCCGAAGGGGAGCTTTTT     |                    |
| 42      | CGCTAAAGCTGTAC—TCTCAGTCCCGAAGGGGAGCTTTTT     |                    |
| 94      | A—GTTGAATAGTGTGGTCACTTCCAGTCCCGCAGGGCACAC    | Group II (12.90%)  |
| 83      | A—GTTGAATAGTGTGGTCACTTCCAGTCCCGCAGGGCACAC    |                    |
| 1       | A—GTTGAATAGTGTGGTCACTTCCAGTCCCGCAGGGCACAC    |                    |
| 4       | A—GTTGAATAGTGTGGTCACTTCCAGTCCCGCAGGGCACAC    |                    |
| 53      | G—AGGAGTATCGGGGC—ACGATCCTATTTAAGGCCGATAACC   |                    |
| 62      | C—GGAGTATACATTCTG—ATCCTATATAGGTAGGCCGAAACC   |                    |
| 81      | C—GGAGTATACATTCTG—ATCCTATATAGGTAGGCCGAAACC   |                    |
| 85      | T—CGACTATGTTGCTAC—ATCCTGTACGGTCAGGGCGAAAG    |                    |
| 25      | CTGATTATATAACGTG—GTGATATCCGGACAAGGCAGAAAA    |                    |
| 67      | AA—G—CTGATTACCAAACACTGC—GTGCCGCCCGACCCGGTGA  |                    |
| 14      | GCTGAGCATCAATTCGCAT—TGATCCCACAGTTGGGCAGCTA   | Group III (10.60%) |
| 92      | CTGAGCATCACGAAGT—GATCCTGTCGAGGACGGGCAGTTA    |                    |
| 52      | CTGAGCATCACGAAGT—GATCCTGTCGAGGACGGGCAGTTA    |                    |
| 13      | CTGAGCATCACGAAGT—GATCCTGTCGAGGACGGGCAGTTA    |                    |
| 16      | CTGAGCATCACGAAGT—GATCCTGTCGAGGACGGGCAGTTA    |                    |
| 71      | CG—C—ACGAGCATCGTACTTCC—GTTATGATCATGAGACACAG  |                    |
| 77      | C—GTGGTTCCTGCGGGCAGGTTAT—CAACATGGGCAATGCGT   |                    |
| 27      | AT—AA—GCTGAGCATCTTAG—GTCCTGTCA—AGGGGCAGCGTAA |                    |
| 10      | ATAAGCTGAGCATCTTAG—ATCC—CTGTCAAGGGCAGCGTAA   |                    |
| 11      | ATAAGCTGAGCATCTTAG—ATCC—CTGTCAAGGGCAGCGTAA   |                    |
| 31      | ATAAGCTGAGCATCTTAG—ATCC—CTGTCAAGGGCAGCGTAA   |                    |
| 24      | ATAAGCTGAGCATCTTAG—ATCC—CTGTCAAGGGCAGCGTAA   |                    |
| 60      | ATAAGCTGAGCATCTTAG—ATCC—CTGTCAAGGGCAGCGTAA   |                    |
| 78      | ATAAGCTGAGCATCTTAG—ATCC—CTGTCAAGGGCAGCGTAA   |                    |
| 28      | A—A—TTGGATTACTTCT—CAAGTCTGATGAGGGCAATTTAAA   |                    |
| 56      | T—TGGGTACCTCGTAGG—TCCTAATGGAGGTGAGGCAACTCC   |                    |

**Table S4. Alignment of the top 36 aptamer sequences obtained from QSAS R3/R2**

| Seq. ID | Sequences (5' → 3')                        |                    |
|---------|--------------------------------------------|--------------------|
| 11      | CTGAGCATCACGAAGTGATCCTGTGCGGGACGGGCAGTTA   | Group I (47.20%)   |
| 32      | CTGAGCATCACGAAGTGGTCCTGTGCGAGGACGGGCAGTTA  |                    |
| 33      | CGAATGCAAGTCCTGACGGAGGCCAGGCGCTGAAACTTGC   |                    |
| 21      | ATAAGCTGAGCATCTTA—GATCC—CTGTCAAGGGCAGTGTA  |                    |
| 1       | ATAAGCTGAGCATCTTA—GATCC—CCGTCAAGGGCAGCGTAA |                    |
| 23      | GATACTGAGAATCGTA-CATGATCC—CGCAACGGGCAGTATC |                    |
| 2       | GATACTGAGCATCGTA-CATGATCC—CGCAACGGGCAGTATT |                    |
| 12      | CCGGGAACATTGTCTAAACAATGTCATTTATGTCGGAAGC   |                    |
| 14      | TAAGGGCACTATTGCATGGTGAGCATCCTTGATCCCGCT    |                    |
| 9       | ATAAGCTGAGCATCTTA—GATCC—CTGTCAAGGGCAGCGTAA |                    |
| 13      | ATAAGCTGAGCACCTTA—GATCC—CTGTCAAGGGCAGCGTAA |                    |
| 18      | AATGGATGGGCACCGCTATAGTTGGTCCCAGGAGGGCATGC  |                    |
| 22      | GATACTGAGCATCGTACA-TGATCC—CGCAACGAGCAGTATC |                    |
| 29      | CATACTGAGCATCGTACATGATCCC—GCAACGGGCAGTATC  |                    |
| 25      | CGGGGCAACAACGTTGAGCATCATTATGATCGCCGCTAT    |                    |
| 24      | AGGTGAGCATCTTTAGATCCCATTTGGGCGCCTTTCTTTT   |                    |
| 8       | TTGGGGCGGTCCCTGTGAAAGGCAAAAATCTATTATACCGC  |                    |
| 16      | CCGTACAGTCTAAGACTCCCATGAACATAGGCGGAAGTA    |                    |
| 6       | CCGTACAGTCTAAGACTTCTATGAACATAGGCGGAAGTA    |                    |
| 30      | CCGTACAGTCTAAGACTCCTATGAACATAGGCGGAAGTA    |                    |
| 34      | CTGTTACAGTCTAAGACTCCTATGAACATAGGCGGAAGTA   |                    |
| 4       | CCGTACAGTCTAAGACTCCTATCAACATAGGCGGAAGTA    |                    |
| 26      | GCTCCGTACCATTCTTATGGTCCCAGGCGGCGCAAACG     |                    |
| 20      | AGTTGAATAGTGTGGTCACTTCCAGTCCCAGGGGGCACAC   | Group III (13.90%) |
| 3       | AGTTGAATGGTGTGGTCACTTCCAGTCCCAGGGGGCACAC   |                    |
| 5       | TGTGGGTATGGTCTAATTTTTAGGCACGGAGGTACCAT     |                    |
| 31      | GCTGAGTTAGATCCCTTTCGTAAGGGCAGCCGGGTATCTA   |                    |
| 7       | TACGAGTTTATCCTTTTCCATTAGGCGTACAGCTCATCAA   |                    |
| 15      | TACGAGTTGATCCTTTTTATTAGGCGTACAGCTCATCAA    |                    |
| 19      | TACGAGTTGATCCTTTTTATTATGCGTACAGCTCATCAA    | Group IV (16.70%)  |
| 36      | GAGGGCTGATGCAATCCTAGTATAGGCAGCATAACATTGC   |                    |
| 10      | GCTGAGTTAGATCCCTTTT—GTAAGGGCAGCCGGGCATCGA  |                    |
| 17      | GCTGAGTTAGATCCCTTTT—GTAAGGGCAGCCGGGCATCTA  |                    |
| 35      | TAAGGTGGGGATAAAGGACGTGCGGGATCGGGGGGGGGAT   |                    |
| 27      | CTTATT—GTGCGGGCACCTCAGGTCCTAAAGTTAGGCGCAC  |                    |
| 28      | TTTATT—GTGCGGGCACCTCAGTTCCTAAAGTTAGGCGCAC  |                    |

**Table S5. Alignment of the top 36 aptamer sequences obtained from QSAS R3/R1**

| Seq. ID | Sequences (5' → 3')                      |                  |
|---------|------------------------------------------|------------------|
| 8       | TGCGGGTTACTTTTAAGTCCCAAGGGGCCGTAGATCACCA | Group I (38.90%) |
| 26      | CGAGGGGTACCCTGCTGGGTCCCCGGTAGGGGCGAGTTCT |                  |
| 12      | TTACGGTGTGGTCACTATTTAGTCCCTACTGGGCACACC  |                  |
| 5       | GCTGGTCACTCTAGAGTCCTTGCAGGCAGCAAACATAAT  |                  |
| 24      | TAAAGGGTGTGGGGCACCCCTCGGGTCCCTGTGGGGCAC  |                  |
| 25      | TTGGATCATTGGCACCTCAGTCCCTACGGGGGAATGATT  |                  |
| 30      | CAGTGGATGGTCACTCCCAGTCCCTAACAGGCATCAACGG |                  |
| 19      | TCAAGTCTTTTtaggcaaccatattgTTGGTCATTTGATA |                  |
| 33      | CTGACGAGGCACGCAAGTGGGCACCTTTAGGTCCCTCTTT |                  |
| 1       | ATTTGAATAGTGTGGTCACTCCAGTCCCGCAGGGCACAC  |                  |
| 34      | AACACGTGGGCACCTTCAGTCCCCCGCGGGGCGCGTG    |                  |
| 35      | ATAATATCATGGTTGGGCACCTAAGGTCACGCAGTGCAAC |                  |
| 23      | ACGTACGTGGGCACCTCTGGTCCAGAAGGGCACGGACCTG |                  |
| 9       | ATGCACGGGACCATGTATGGTCTGATTATAGGGCGTGG   |                  |
| 31      | TAGTTTATGTAATCCTGTCTTCAGGCCAGACGGTAACC   |                  |
| 18      | GGTGGTCACTAGCTTAGTCCCATTACTTGGGCACCAGGGT |                  |
| 11      | GGAGCGTCACTAATTTAGTCCCAATAGGGGGATCCTTATC |                  |
| 20      | TGTCGAGCATCAGTGGGTGATCCTGAGGGACCAGGCGAC  |                  |
| 15      | GAGAGCTGATGCAATCCTAGTATAGGCAGCATAACATTT  |                  |
| 21      | GGGACGGAGCATCGTTTACGATCCCCGCGGGCCGTGGCA  |                  |
| 27      | CCGTTACAGTCTAAGACTCCTATGAACATGGGCGGAAGTA |                  |
| 36      | CTGCGGTCACTGCTCAGTCTGCAATAGCAGGCGCAGACT  |                  |
| 3       | CGGGCGCTGGGGCGGGTACCTTTGGTCCCGATATCAAATC |                  |
| 6       | ATTCAGATTAAGGGCTGCCTGAACTCGTTCCCGGTATCAT |                  |
| 32      | GTTTCCATACGGCACCTATGGTCTTGTAAGGGTATGGT   |                  |
| 17      | TATGATCAAATCCTCGTTGTACGGGGCATAAACTGATTG  |                  |
| 7       | TCCATCGAGGCATCCCTGTAAAGAGGATCATGAGTACGT  |                  |
| 29      | CGTCTCAGTAGATATTACTCCTAGCTAAACTAGGCGTGAG |                  |
| 4       | TACTTGAGCATCGTTTTATGATCCTTTGGGCAAGTCCGT  |                  |
| 10      | AATACCGTCACTTTTtagtctgtTGTTAAGAGCAGGGGGT |                  |
| 14      | CTCTCGTCACTTTAGTCCCTTTAAAGGGGAGAGCTTCG   |                  |
| 28      | GTCGCTCGTTGTACGGTAGGTCCCTGAAGGGGAGCGATG  |                  |
| 13      | TAGGCATGTAATGAGCATCTGTGATCCTATGGTTCTTCAT |                  |
| 22      | GCGTTCGAAGTTAGCGGAATTCCTCACTAGGCGCAAGGA  |                  |
| 16      | GGCTCGGAACCGCATAGTGGTCTGGTCCAGGGGAGCC    |                  |
| 2       | TAGTCTGTTACGGTCTCGATTGTCCAAAAGGGCAGACA   |                  |
